# Supplementary material
Source: PubMed Central journal article supplement (PMC8028263)
Supplement: BPA-29-63-s001.pdf [file BPA-29-63-s001.pdf]

Supplementary Figure S1: Correlations of cathepsin D immunoreactivities cognitive status

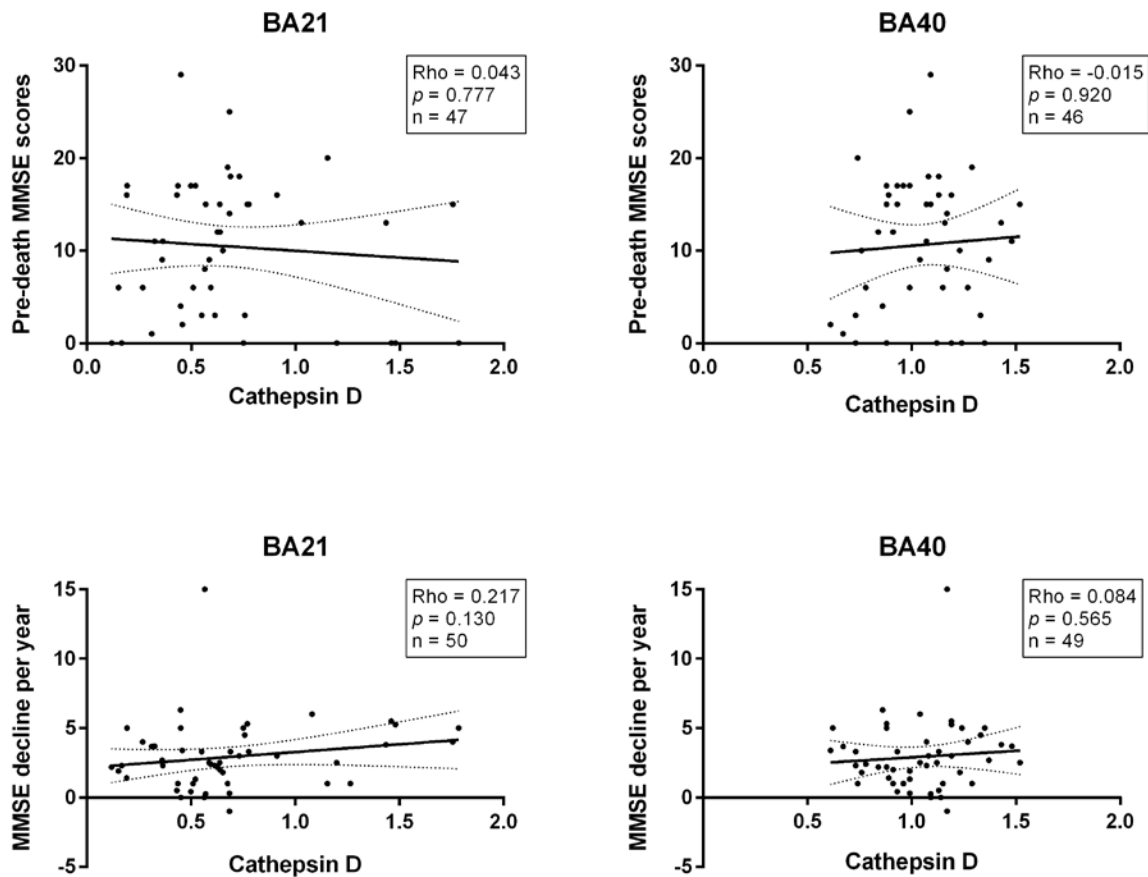

**Fig. S1** Scatter plots of cognitive status (Pre-death MMSE score and MMSE decline per year; see Methods) against cathepsin D immunoreactivities (arbitrary units) in BA21 (left) and BA40 (right) of the combined dementia cohort. The solid lines indicate linear regressed best-fit curves while dashed lines indicate their respective 95% confidence intervals. No significance was found using Spearman correlation.
